# Supplementary material for: Charge-induced local dewetting on polymer electrets studied by atomic force microscopy
Source: Royal Society of Chemistry journal article supplement (doi:10.1039/c3sm51997j), 2013-01-01
Supplement: c3sm51997j.pdf [file c3sm51997j.pdf]

Supplementary Material (ESI) for Chemical Communications

This journal is © The Royal Society of Chemistry 2013

## Supporting Information

### Charge-induced Local Dewetting on Polymer Electrets Studied by Atomic Force Microscopy

Dan Zhao,<sup>a</sup> ‡ Jiaxi Peng,<sup>a</sup> ‡ Xiaofeng Tang,<sup>a</sup> DongDong Zhang,<sup>b,c</sup> Xiaohui Qiu,<sup>b</sup>

Yanlian Yang,<sup>b</sup> Yapei Wang,<sup>a</sup> Meining Zhang,<sup>\*a</sup> Li Guan<sup>\*a</sup>, Tingbing Cao

<sup>a</sup> Department of Chemistry, Renmin University of China, Beijing 100872, P.R.

China. <sup>b</sup> Key Laboratory of Standardization and Measurement for Nanotechnology  
(Chinese Academy of Sciences), National Center for Nanoscience and Technology,  
Beijing 100190, P. R. China

<sup>c</sup> Department of Policing Intelligence, China Criminal Police University, Shenyang  
11085, P.R. China.

‡ These two authors contribute equally to this paper

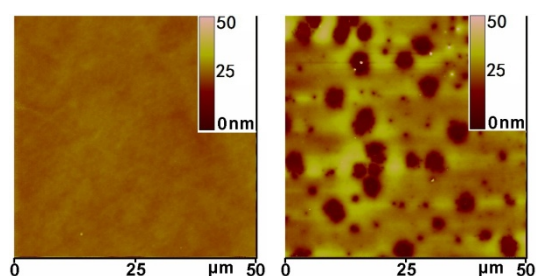

**Fig. S1.** The surface morphology of uncharged a) thin PMMA and b) PS films (with thickness of 30 nm) after thermal annealing at 190 °C for 5s.

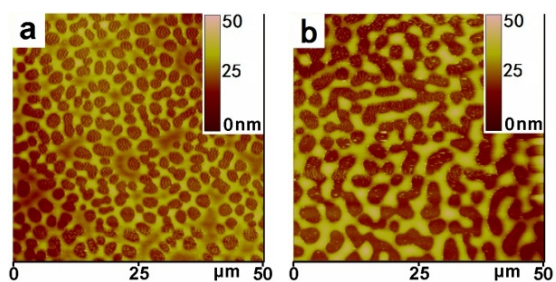

**Fig. S2.** Topographic images of PMMA a) and PS b) with charge pattern dewetted in THF and acetone solvent for 1 min, respectively.

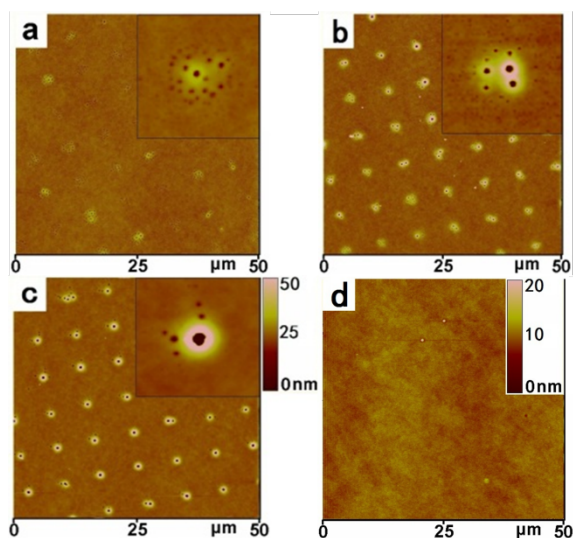

**Fig. S3.** The surface morphology of thin PMMA films (with thickness of 120 nm) evolving with time while annealed in THF: water solution on the substrates with patterned charges. a) 2 min, b) 4 min, c) 5 min. d) The surface morphology of uncharged thin PMMA (with thickness of 120 nm) after thermal annealing at 190 °C.

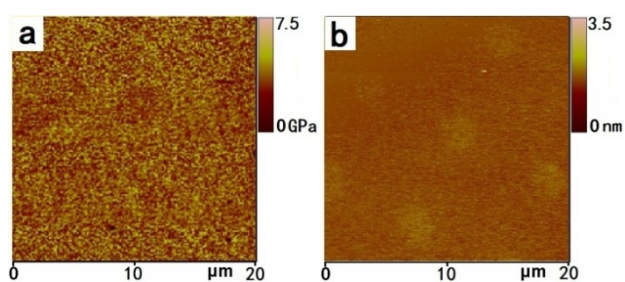

**Fig. S4.** The images of a) modulus mapping and b) sample deformation of PMMA with charge pattern. The tip elastic coefficient is 34 N/m.
